# Supplementary material for: Cicadidae Periostracum, the Cast-Off Skin of Cicada, Protects Dopaminergic Neurons in a Model of Parkinson's Disease
Source: PubMed Central journal article supplement (PMC6854990; doi:10.1155/2019/5797512), 2019-10-24
Supplement: 5797512.f1.pdf [file 5797512.f1.pdf]

# Supplementary Data

**Cicadidae Periostracum, the cast-off skin of cicada, protects dopaminergic neurons in a model of Parkinson's disease**

***Running title: Cicadidae Periostracum protects dopaminergic neurons***

**Hye-Sun Lim<sup>1\*</sup>, Joong-Sun Kim<sup>1</sup>, Byeong Cheol Moon<sup>1</sup>, Goya Choi<sup>1</sup>, Seung Mok Ryu<sup>1</sup>, Jun Lee<sup>1</sup>, Mary Jasmin Ang<sup>2</sup>, Mijin Jeon<sup>2</sup>, Changjong Moon<sup>2</sup>, and Gunhyuk Park<sup>1¶</sup>**

<sup>1</sup>*Herbal Medicine Resources Research Center, Korea Institute of Oriental Medicine, 111 Geonjae-ro, Naju-si, Jeollanam-do, 58245, Republic of Korea*

<sup>2</sup>*College of Veterinary Medicine and BK21 Plus Project Team, Chonnam National University, Gwangju 61186, Republic of Korea*

**¶Corresponding author:** Gunhyuk Park, Ph.D.

Senior Researcher, Herbal Medicine Resources Research Center, Korea Institute of Oriental Medicine, 111 Geonjae-ro, Naju-si, Jeollanam-do, 58245, Republic of Korea

Tel.: +82-61-338-7112

E-mail address: [gpark@kiom.re.kr](mailto:gpark@kiom.re.kr) and [parkgunhyuk@gmail.com](mailto:parkgunhyuk@gmail.com)

## **Supplementary Materials**

### **Materials and Methods**

#### **Data collection and scientometric analysis**

The Science Citation Index Expanded citation index databases in the Web of Science core collection, a common data source for scientific and bibliometric research, were retrieved as the source database for this study. The search expressions included the application of “PD” to the “Nurr1” field, which retrieves the title, abstract, and keywords of publications in Web of Science to find the required literature. The time span was “2002 to 2019”, and the publication types selected were “Article” and “Review” because they represent most of the literature with complete research results. After the search, a total of 335 eligible documents were collected, and the search results were saved as “Other File Formats” with “Full Record and Cited References” on 20 March 2019.

#### **Data analyses**

We used the Search Tool for the Retrieval of Interacting Gene (STRING) software to construct a network model showing protein interactions based on known and predicted protein–protein interactions. In addition, protein ontology and functional relationships were obtained from the Kyoto Encyclopedia of Genes and Genomes (KEGG) database. The main research method of this paper was based on Scientometrics, and analysis software included the Visualization of Similarities viewer (VOSviewer; developed by van Eck and Waltman of Leiden University in The Netherlands) (version 1.6.9; [www.vosviewer.com](http://www.vosviewer.com)) and text files. VOSviewer can analyze complex networks using clustering analysis according to the connection strength between projects. It has strong advantages such as mapping knowledge domain display, especially clustering; in analyzing large-scale data sets; and constructing complex networks.

#### **Liquid chromatography-mass spectrometry (LC-MS) analysis**

LC-MS was performed using an Acquity Ultra high-performance liquid chromatography system (Waters, Milford, MA, USA) and LCQ Fleet Ion Trap mass spectrometer (Thermo Scientific, Madison, WI, USA). Chromatographic separation was performed using an Acquity UPLC BEH C18 column (inner diameter, 2.1 × 100 mm, 1.7 μm). The mobile phase consisted of water containing 0.5% formic acid and acetonitrile using a gradient of 5–50 % for 0–15 min with a flow rate of 300 μL/min. The MS spectrometer parameters were as follows: nebulizing and sheath nitrogen gas pressure, 60 and 20 psi; capillary temperature, 200 °C; and capillary voltage, –26 V.

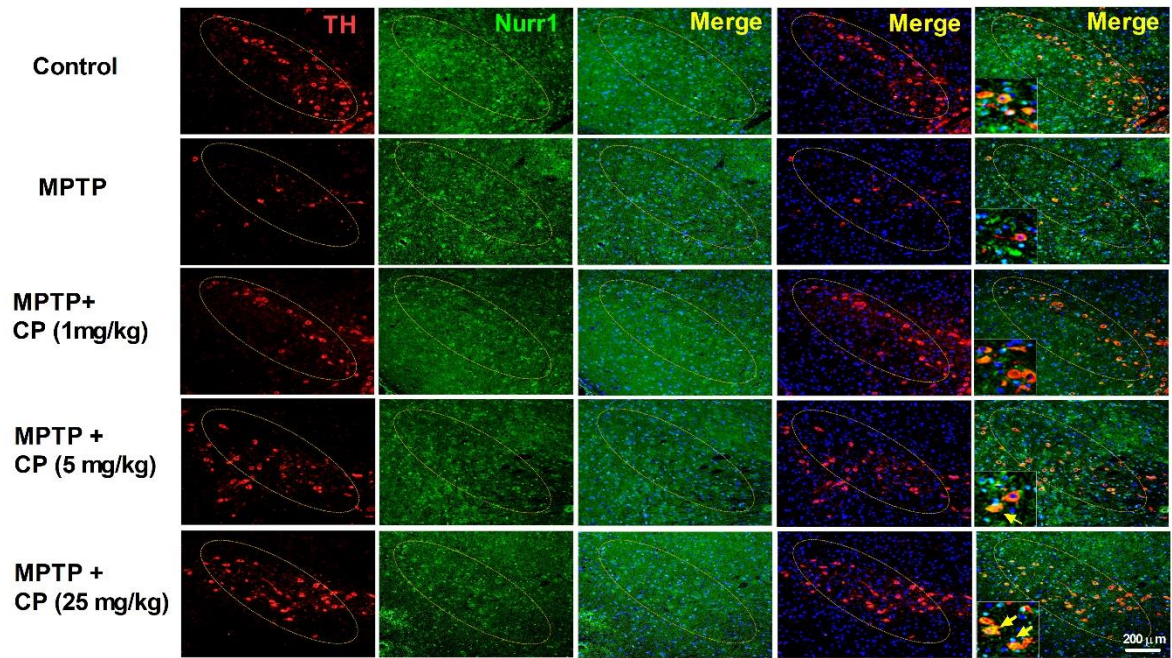

**Supplementary Fig. 1** Effects of CP on MPTP-induced Nurr1 levels. Seven days after the last MPTP treatment, Nurr1 levels were measured by immunofluorescence in dopaminergic neurons of SNpc.

(A)

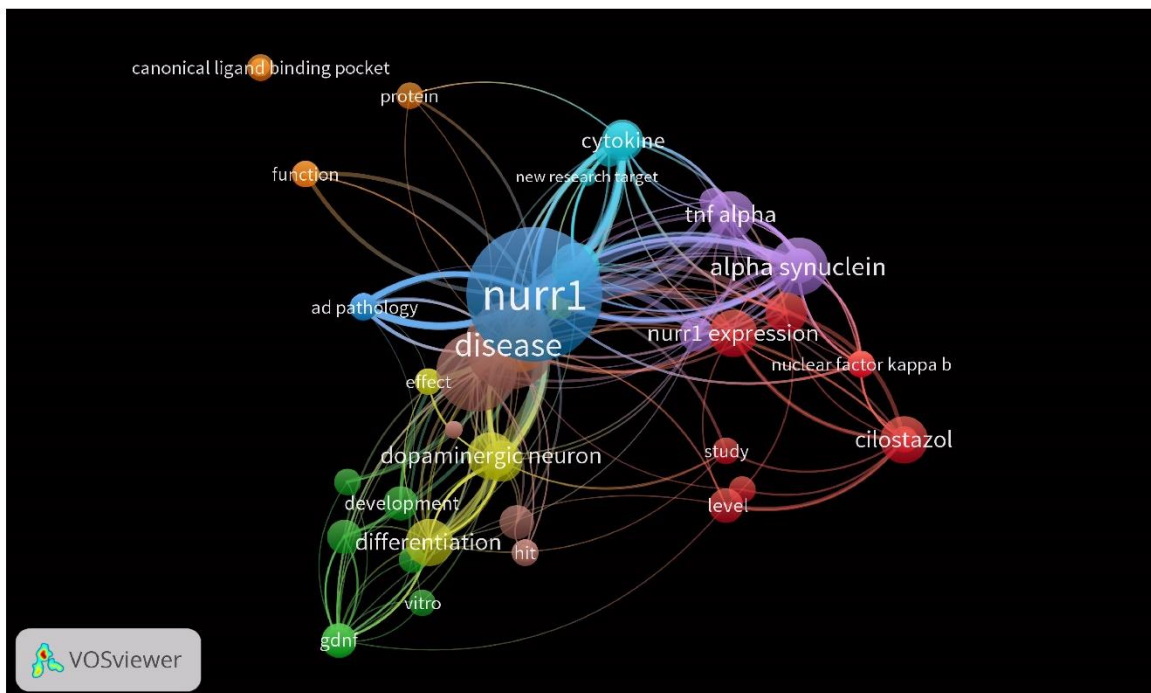

(B)

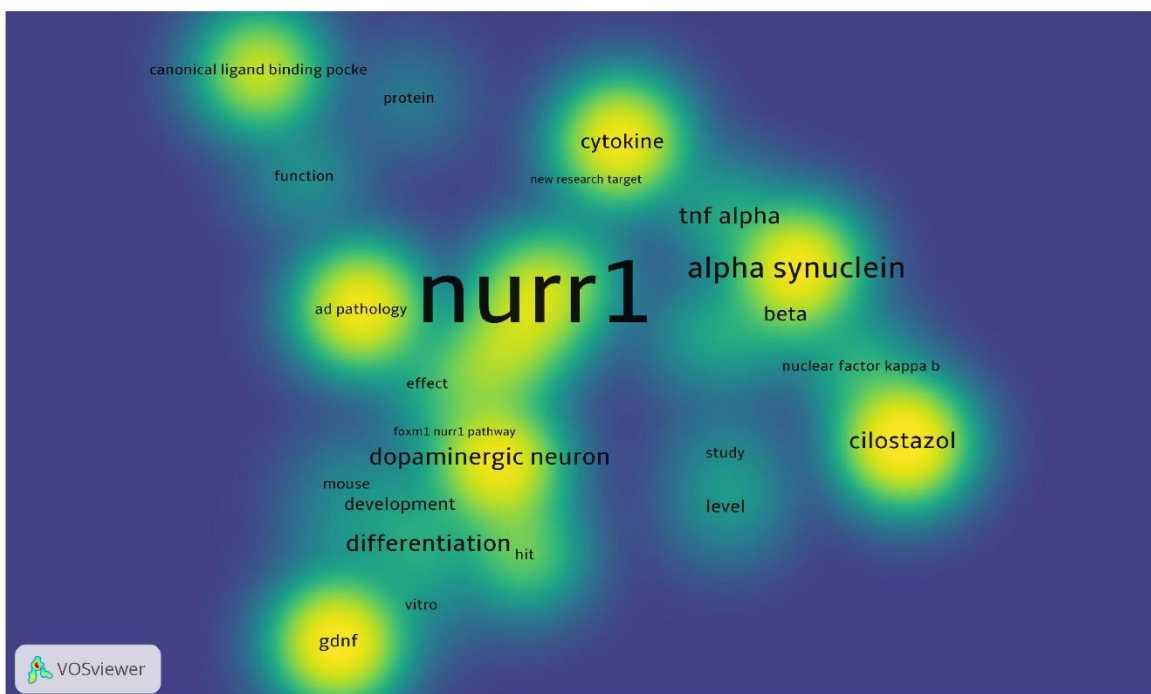

**Supplementary Fig 2.** Keywords cluster network (A) and density visualization (B) of articles published in 2002–2019.

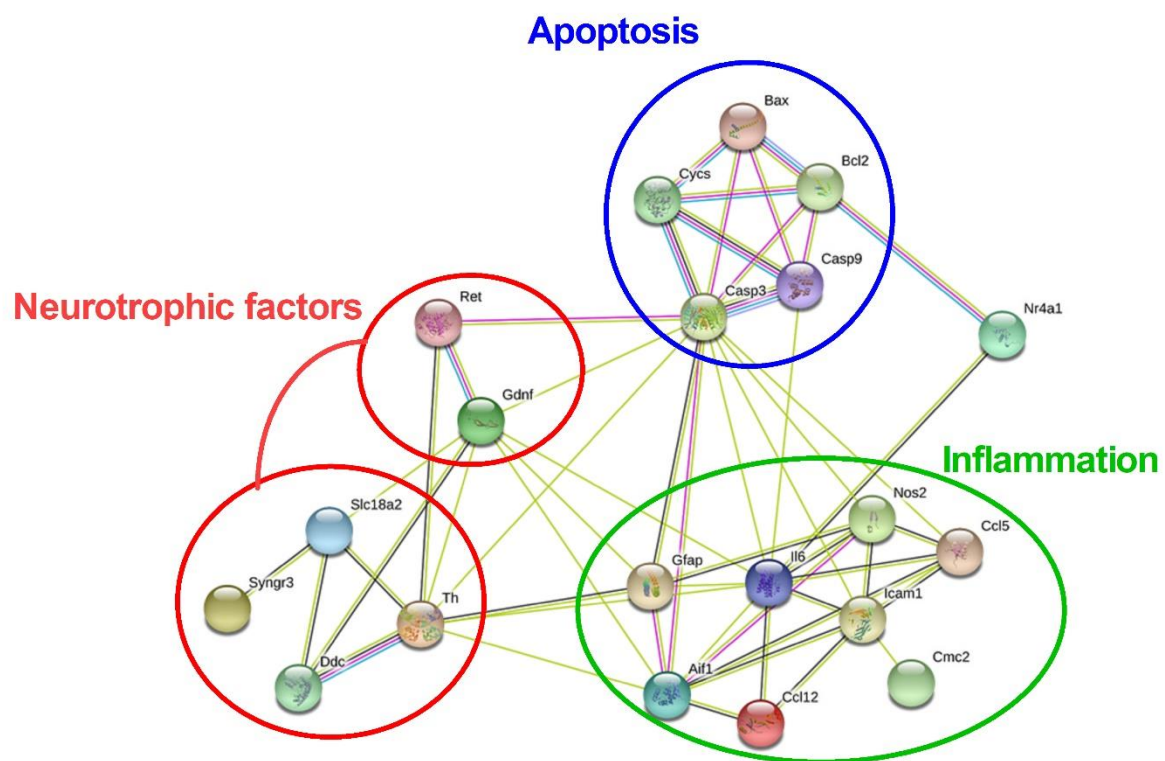

**Supplementary Fig 3.** A network of clusters and functional relationships from proteins, generated using STRING software

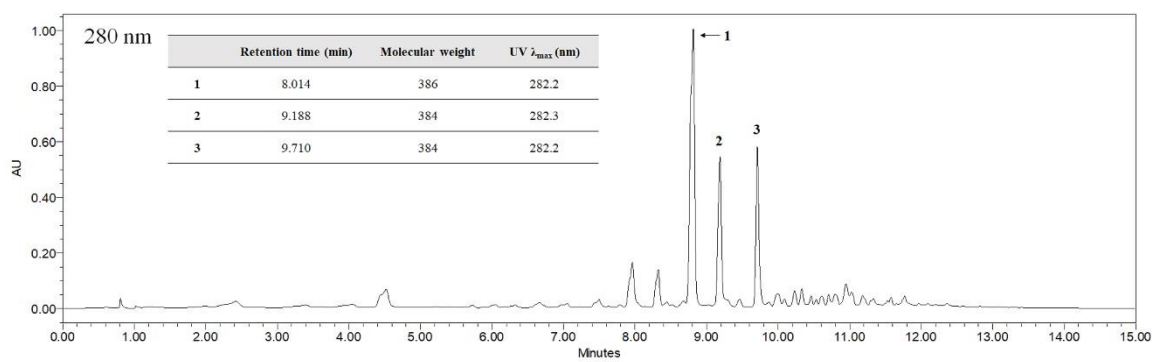

**Supplementary Fig 4.** LC-MS analysis of CP. UPLC chromatogram monitored at 280 nm.

**Supplementary Table 1.** List of antibodies.

| <b>Primary antibody</b>                       | <b>Host</b> | <b>Company</b>           | <b>Catalog#</b> |
|-----------------------------------------------|-------------|--------------------------|-----------------|
| Tyrosine hydroxylase (TH)                     | Mouse       | Millipore                | MAB318          |
|                                               | Rabbit      | Millipore                | AB152           |
| Nuclear receptor-related 1 (Nurr1)            | Rabbit      | Origene                  | TA309774        |
| DOPA decarboxylase (DDC)                      | Rabbit      | Abcam                    | AB3905          |
| Dopamine transporter (DAT)                    | Rat         | Santa Cruz Biotechnology | SC-32258        |
| Vesicular monoamine transporter (VMAT2)       | Rabbit      | Santa Cruz Biotechnology | SC-15314        |
| $\beta$ -actin ( $\beta$ -actin)              | Mouse       | Santa Cruz Biotechnology | SC-47778        |
| B-cell lymphoma 2 (Bcl-2)                     | Rabbit      | Santa Cruz Biotechnology | SC-783          |
| Bcl-2-associated X (Bax)                      | Rabbit      | Abcam                    | AB7977          |
| Cytochrome-C (Cyt-C)                          | Mouse       | Santa Cruz Biotechnology | SC-13156        |
| Cleaved caspase-9                             | Mouse       | Cell Signaling           | #9509           |
| Cleaved caspase-3                             | Rabbit      | Cell Signaling           | #9661           |
| Poly [ADP-ribose] polymerase 1 (PARP1)        | Mouse       | Santa Cruz Biotechnology | SC-8007         |
|                                               | Mouse       | Santa Cruz Biotechnology | SC-13147        |
| Glial cell-derived neurotrophic factor (GDNF) | Rabbit      | Alomone Labs             | ANT-014         |
|                                               | Rabbit      | Abcam                    | AB18956         |
| Ret                                           | Mouse       | R&D Systems              | AF482           |
| Glial fibrillary acidic protein (GFAP)        | Goat        | Santa Cruz Biotechnology | SC-6170         |
| Allograft inflammatory factor 1 (Iba-1)       | Rabbit      | Wako                     | 019-19741       |
|                                               | Rabbit      | Wako                     | 016-20001       |
| Nitric oxide synthase (iNOS)                  | Rabbit      | Thermo Fisher Scientific | PA1-036         |
| Cyclooxygenase-2 (Cox-2)                      | Rabbit      | Santa Cruz Biotechnology | SC-1747         |
| <b>Secondary antibody</b>                     |             | <b>Company</b>           | <b>Catalog#</b> |
| Biotinylated goat anti-mouse IgG              |             | Vector Laboratories      | BA-9200         |
| Biotinylated goat anti-rabbit IgG             |             | Vector Laboratories      | BA-1000         |
| Biotinylated goat anti-rat IgG                |             | Vector Laboratories      | BA-9400         |
| Biotinylated horse anti-goat IgG              |             | Vector Laboratories      | BA-9500         |
| Alexa Fluor® 594                              |             | Thermo Fisher Scientific | A11032          |
| Alexa Fluor® 488                              |             | Thermo Fisher Scientific | A11008          |
| Goat anti-rabbit IgG-HRP                      |             | Santa Cruz Biotechnology | SC-2030         |
| Goat anti-mouse IgG-HRP                       |             | Santa Cruz Biotechnology | SC-2061         |
| Bovine anti-goat IgG-HRP                      |             | Santa Cruz Biotechnology | SC-2378         |

**Supplementary Table 2.** List of primer sequences for real-time RT-PCR.

| <b>Gene</b>  | <b>Sequences of primers (5' to 3')</b> |                      | <b>Annealing<br/>(°C)</b> |
|--------------|----------------------------------------|----------------------|---------------------------|
|              | <b>Forward</b>                         | <b>Reverse</b>       |                           |
| <b>Nurr1</b> | GCAGACTTTAGGTGCATGTTGG                 | CCCGTCAGATCTCCTTGTC  | 59                        |
| <b>TH</b>    | CAGAAGAGCCGTCTCAGAGC                   | CCTCGAATACCACAGCCTCC | 59                        |
| <b>DAT</b>   | TGTATGTGGTCGTGGTCAGC                   | GGCCAGTTTCTCTCGGAAGG | 59                        |
| <b>VMAT2</b> | TGTGACCAACACGACTGTCC                   | CAAGAGGAGCCGATTCCCTG | 59                        |
| <b>GAPDH</b> | CCCTTAAGAGGGATGCTGCC                   | ACTGTGCCGTTGAATTTGCC | 59                        |
